# Supplementary material for: Graphene oxide grafted polyethylenimine electron transport materials for highly efficient organic devices
Source: Royal Society of Chemistry journal article supplement (doi:10.1039/c5ta06020f), 2015-01-01
Supplement: c5ta06020f1.pdf [file c5ta06020f1.pdf]

## Supporting Information

### Graphene oxide grafted polyethylenimine electron transport material for highly efficient organic devices

Jeongmo Kim,<sup>a</sup> Heeryung Lee,<sup>a</sup> Seung Joo Lee,<sup>a</sup> Wilson Jose da Silva,<sup>\*b</sup> Abd. Rashid bin Mohd Yusoff,<sup>a</sup> and Jin Jang<sup>a</sup>

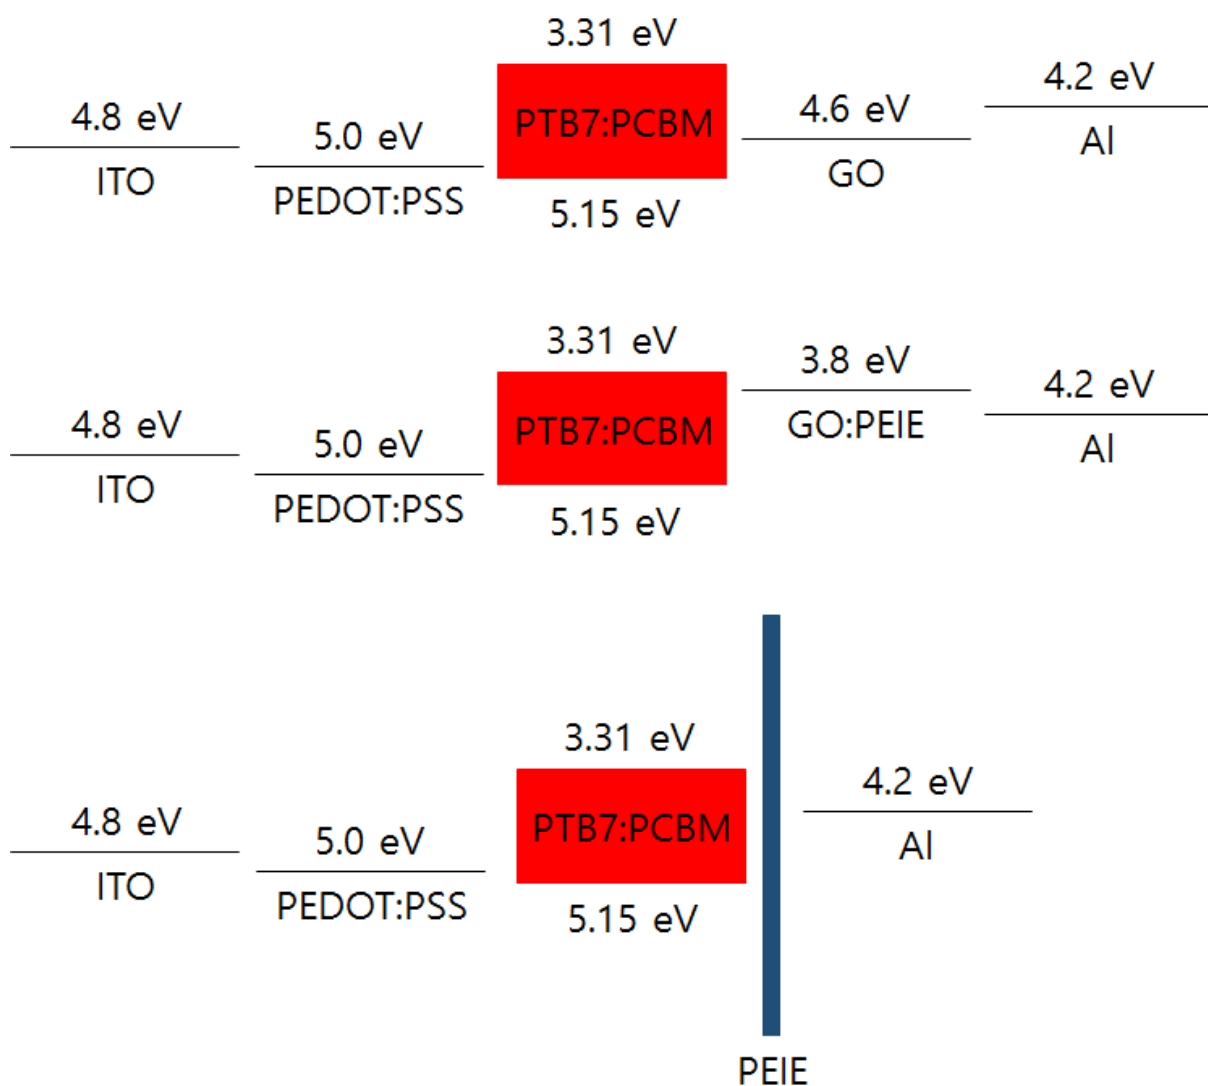

**Figure S1.** Energy levels of GO, GO:PEIE, and PEIE based conventional organic solar cells.
